# Supplementary material
Source: Elsevier journal article supplement (https://www.sciencedirect.com/science/article/pii/S0212656715001857)
Supplement: mmc1 [file S0212656715001857:mmc1.docx]

| Variables | **América Central / Suramérica**  **(n=130)** | | **Asia**  **(n=72)** | | **Europa Occidental**  **(n=7)** | | **Europa del Este**  **(n=5)** | | **África**  **(n=11)** | | **TOTAL**  **(n=225)** | | **p** |
| --- | --- | --- | --- | --- | --- | --- | --- | --- | --- | --- | --- | --- | --- |
|  | N | % | N | % | N | % | N | % | N | % | N | % |  |
| Sexo  Hombre  Mujer | 56  74 | 43.1*  56.9* | 41  31 | 56.9*  43.1* | 5  2 | 71.4*  28.6* | 2  3 | 40*  60* | 10  1 | 90.9*  9.1* | 114  111 | 50.7*  49.3* | p = 0.019 |
| Edad  <30 años  30-45 años  >45 años | 39  63  28 | 30.0  48.5  21.5 | 27  34  11 | 37.5  47.2  15.3 | 5  1  1 | 71.4  14.3  14.3 | 2  3  0 | 40  60  0 | 6  1  4 | 54.5  9.1  36.4 | 79  102  44 | 35.1  45.3  19.6 |  |
| Estado civil:  Soltero/a  Casado/a  Otros (Viudo/a, Divorciado/a...)  AI | 70  52  7  1 | 53.8  40.0  5.4  0.8 | 33  35  4  0 | 45.8  48.6  5.6  0.0 | 5  1  1  0 | 71.4  14.3  14.3  0.0 | 3  2  0  0 | 60  40  0  0.0 | 6  5  0  0 | 54.5  45.5  0.0  0.0 | 117  95  12  1 | 52.0  42.2  5.3  0.5 |  |
| Nivel de estudios:  Ninguno  Básico(leer/escribir)  Primarios (hasta los 14 años)  Secundarios (hasta los 18 años)  Superior (Universidad o equivalente) | 1  1  13  57  58 | 0.8  0.8  10.0  43.8  44.6 | 1  9  8  22  32 | 1.4  12.5  11.1  30.6  44.4* | 0  0  0  2  5 | 0.0  0.0  0.0  28.6  71.4 | 0  0  0  1  4 | 0.0  0.0  0.0  20.0  80.0 | 0  1  4  4  2 | 0.0  9.1  36.4  36.4  18.2 | 2  11  25  86  101 | 0.9  4.9  11.1  38.2  44.9 | p = 0.32 |
| Situación laboral  Trabajador  Desempleado | 77  53 | 59.2*  40.8* | 34  38 | 47.2*  52.8* | 7  0 | 100.0*  0.0* | 2  3 | 40.0*  60.0* | 2  9 | 18.2*  81.8* | 122  103 | 54.2*  45.8* | p = 0.00 |
| Permiso de residencia:  Con permiso de residencia legal  Sin permiso de residencia legal | 128  2 | 1.5*  98.5* | 55  17 | 76.4*  23.6* | 7  0 | 100.0*  0.0* | 5  0 | 100.0*  0.0* | 8  3 | 72.7*  27.3* | 203  22 | 90.2*  9.8* | p = 0.038 |
| Estado de salud autopercibida:  Excelente  Bueno  Regular  Malo  Muy Malo  AI | 26  84  17  1  1  1 | 20.0  64.6  13.1  0.8  0.8  0.8 | 16  34  18  3  1  0 | 22.2  47.2  25.0  4.2  1.4  0.0 | 1  2  3  1  0  0 | 14.3  28.6  42.9  14.3  0.0  0.0 | 1  2  2  0  0  0 | 20.0  40.0  40.0  0.0  0.0  0.0 | 1  5  3  0  2  0 | 9.1  45.5  27.3  0.0  18.2  0.0 | 45  127  43  5  4  1 | 20.0  56.4  19.1  2.2  1.8  0.4 |  |

**Tabla 1:** Variables socio-demográficas agrupadas por regiones.

*A.I: Ausencia de información por falta de respuesta. * Prueba de chi-cuadrado con diferencia significativa p<0.05.*

**Tabla 2:** Calidad de los servicios con respecto a sexo, edad y región de origen.

| **Variables** | **Sexo** | | | | **Edad (años)** | | | | | | **América Central /**  **Suramérica** | | **Asia** | | **Europa**  **Occidental** | | **Europa del**  **Este** | | **África** | | **TOTAL** | | **p** |
| --- | --- | --- | --- | --- | --- | --- | --- | --- | --- | --- | --- | --- | --- | --- | --- | --- | --- | --- | --- | --- | --- | --- | --- |
| Hombre | | Mujer | | <30 | | 30-45 | | >45 | |
| N | % | N | % | N | % | N | % | N | % | N | % | N | % | N | % | N | % | N | % | N | % |  |
| Tiempos de espera razonables  De acuerdo  Parcialmente de acuerdo  No está de acuerdo  No sabe  A.I | 34  41  30  8  1 | 29.8  36.0  26.3  7.0  0.9 | 38  37  30  6  0 | 34.2  33.4  27.0  5.4  0.0 | 25  28  19  7  0 | 31.6  35.4  24.1  8.9  0.0 | 29  37  30  5  1 | 28.4  36.3  29.4  4.9  1.0 | 18  13  1  2  0 | 52.9  38.3  2.9  5.9  0.0 | 38  44  40  8  0 | 29.2  33.8  30.8  5.9  0.0 | 30  25  12  4  1 | 41.7  34.7  16.7  5.6  1.4 | 1  4  1  1  0 | 14.3  57.1  14.3  14.3  0.0 | 1  1  3  0  0.0 | 20.0  20.0  60.0  0.0  0.0 | 2  4  4  1  0 | 18.2  36.4  36.4  9.1  0.0 | 72  78  60  14  1 | 32.0  34.7  26.7  6.2  0.4 |  |
| Tiempo dedicado por profesionales  De acuerdo  Parcialmente de acuerdo  No está de acuerdo  No sabe | 44  43  18  9 | 38.6*  37.7*  15.8*  7.9* | 55  21  31  4 | 49.5*  18.9*  27.9*  3.6* | 37  21  12  9 | 46.8  26.6  15.2  11.4 | 45  29  25  3 | 44.1  28.4  24.5  2.9 | 17  14  12  1 | 8.6  31.8  27.3  2.3 | 41  42  39  8 | 31.5*  32.3*  30.0*  6.2* | 49  17  4  2 | 68.0*  23.6*  5.6*  2.8* | 3  2  1  1 | 42.9*  28.6*  14.3*  14.3* | 1  1  3  0 | 20.0*  20.0*  60.0*  0.0* | 5  2  2  2 | 45.5*  18.2*  18.2*  18.2* | 99  64  49  13 | 44.0  28.4  21.8  5.8 | p = 0.013 |
| Atención a las diferencias culturales  De acuerdo  Parcialmente de acuerdo  No está de acuerdo  No sabe | 50  31  15  18 | 43.9  27.2  13.2  15.9 | 50  23  26  12 | 45.0  20.7  23.4  10.8 | 35  22  10  12 | 44.3  27.8  12.7  15.2 | 46  23  18  15 | 45.1  22.5  17.6  14.7 | 19  9  13  3 | 43.2  20.5  29.5  6.8 | 47  33  30  20 | 36.2*  25.4*  23.0*  15.4* | 44  17  5  6 | 61.1*  23.6*  6.9*  8.3* | 2  2  2  1 | 28.6*  28.6*  28.6*  14.3* | 2  0  1  2 | 40.0*  0.0*  20.0*  40.0* | 5  2  3  1 | 45.5*  18.2*  27.3*  9.1* | 100  54  41  30 | 44.4  24.0  18.2  13.3 | p = 0.05 |
| Trámites sencillos  De acuerdo  Parcialmente de acuerdo  No está de acuerdo  No sabe  A.I | 54  35  14  11  0 | 47.4  30.7  12.3  9.6  0.0 | 52  25  23  9  2 | 46.8  22.5  20.7  8.2  1.7 | 38  23  9  8  1 | 48.1  29.1  11.4  10.1  1.3 | 49  25  17  10  1 | 48.0  24.5  16.7  9.8  1.0 | 19  12  11  2  0 | 43.2  27.3  25.0  4.5  0.0 | 55  41  24  8  2 | 42.3  31.5  18.5  6.2  0.9 | 44  14  6  8  0 | 61.1  19.4  8.3  11.1  0.0 | 2  1  2  2  0 | 28.6  14.3  28.6  28.6  0.0 | 1  2  2  0  0 | 20.0  40.0  40.0  0.0  0.0 | 4  2  3  2  0 | 36.4  18.2  27.3  18.2  0.0 | 106  60  37  20  2 | 47.1  26.7  16.4  8.8  0.9 |  |
| Discriminación hacia los inmigrantes  De acuerdo  Parcialmente de acuerdo  No está de acuerdo  No sabe | 47  26  21  20 | 41.2*  22.8*  18.4*  17.6* | 32  29  38  12 | 28.8*  26.1*  34.2*  10.8* | 31  20  16  12 | 39.2  25.3  20.3  15.2 | 36  20  30  16 | 35.3  19.6  29.4  15.6 | 12  15  13  4 | 27.3  34.1  29.5  9.1 | 40  30  41  19 | 30.8  23.1  31.5  14.6 | 33  18  12  9 | 45.8  25.0  16.7  12.5 | 2  1  2  2 | 28.6  14.3  28.6  28.6 | 1  2  2  0 | 20.0  40.0  40.0  0.0 | 3  4  2  2 | 27.3  36.4  18.2  18.2 | 79  55  59  32 | 35.1  24.4  26.2  14.2 | P=0,014 |

*A.I: Ausencia de información por falta de respuesta. * Prueba de chi-cuadrado con diferencia significativa p<0.05.*

**Tabla 3:** Utilización de los servicios con respecto a las variables socio-demográficas.

| **Variables** | **Atención Primaria** | | | | | | **Hospitalización** | | | | | | **Urgencias** | | | | | | **p** |
| --- | --- | --- | --- | --- | --- | --- | --- | --- | --- | --- | --- | --- | --- | --- | --- | --- | --- | --- | --- |
| Si | | No | | AI | | Si | | No | | AI | | Si | | No | | AI | |  |
| N | % | N | % | N | % | N | % | N | % | N | % | N | % | N | % | N | % |  |
| Sexo  Hombre  Mujer | 101  102 | 49.8  50.2 | 13  7 | 65.0  35.0 | 0  2 | 0.0  100 | 38  33 | 53.5  46.5 | 72  76 | 48.6  51.4 | 4  2 | 66.7  33.3 | 67  76 | 46.9  53.1 | 45  34 | 57.0  43.0 | 2  1 | 66.7  33.3 |  |
| Edad  <30 años  30-45 años  45 años | 67  95  41 | 33.0  46.8  20.2 | 10  7  3 | 50.0  35.0  15.0 | 2  0  0 | 100  0.0  0.0 | 22  34  15 | 31.0  47.9  21.1 | 57  63  28 | 38.5  42.6  18.9 | 0  5  1 | 0.0  83.3  16.7 | 48  64  31 | 33.6  44.8  21.7 | 31  36  12 | 39.2  45.6  15.2 | 0  2  1 | 0.0  66.7  33.3 |  |
| Estado civil:  Soltero/a  Casado/a  Otros (Viudo/a, Divorciado/a...)  AI | 105  88  10  1 | 51.7  43.3  4.9  0.4 | 11  7  2  1 | 55.0  35.0  10.0  0.4 | 2  0  0  0 | 100  0.0  0.0  0.0 | 30  39  2  0 | 42.3  54.9  2.8  0.0 | 83  54  10  1 | 56.1  36.5  6.8  0.7 | 4  2  0  0 | 66.7  33.3  0.0  0.0 | 70  66  7  0 | 49.0  46.2  4.9  0.0 | 45  28  5  1 | 57.0  35.4  6.3  1.3 | 2  1  0  0 | 66.7  33.3  0.0  0.0 |  |
| Nivel de estudios:  Ninguno  Básico (leer/escribir)  Primario (hasta los 14 años)  Secundarios (hasta los 18 años)  Superior (Universidad o equivalente) | 2  11  25  79  86 | 1.0  5.4  12.3  38.9  42.4 | 0  0  0  7  13 | 0.0  0.0  0.0  35.0  65.0 | 0  0  0  0  2 | 0.0  0.0  0.0  0  100 | 0  4  9  30  28 | 0.0  5.6  12.7  42.3  39.4 | 2  7  16  53  70 | 1.4  4.7  10.8  35.8  47.8 | 0  0  0  3  3 | 0.0  0.0  0.0  50.0  50.0 | 1  4  19  60  59 | 0.7  2.8  13.3  42.0  41.3 | 1  7  6  26  39 | 1.3  8.9  7.6  32.9  49.4 | 0  0  0  0  3 | 0.0  0.0  0.0  0.0  100 |  |
| Situación laboral  Trabajador  Desempleado | 113  90 | 55.7  44.3 | 9  11 | 45.0  55.0 | 0  2 | 0.0  100 | 40  31 | 56.3  43.7 | 78  70 | 52.7  47.3 | 2  4 | 33.3  66.7 | 84  59 | 58.7  41.3 | 37  42 | 46.8  53.2 | 1  2 | 33.3  66.7 |  |
| Permiso de residencia:  Con permiso de residencia legal  Sin permiso de residencia legal | 184  19 | 90.6  9.4 | 18  2 | 90.0  10.0 | 1  1 | 50.0  50.0 | 63  8 | 88.7  11.3 | 134  14 | 90.5  9.5 | 6  0 | 100  0.0 | 137  6 | 95.8*  4.2* | 63  16 | 79.7*  20.3* | 3  0 | 100.*  0.0* | p = 0.05 |
| Estado de salud autopercibida:  Excelente  Bueno  Regular  Malo  Muy Malo  AI | 38  114  41  5  4  1 | 18.7  56.2  20.2  2.5  2.0  0.5 | 7  11  2  0  0  0 | 35.0  55.0  10.0  0.0  0.0  0.0 | 0  0  2  0  0  0 | 0  0  100  0  0  0 | 18  36  14  0  3  0 | 25.4  50.7  19.7  0.0  4.2  0.0 | 26  86  29  5  1  1 | 17.6  58.1  19.6  3.4  0.7  0.7 | 1  5  0  0  0  0 | 167  83.3  0  0  0  0 | 28  76  31  4  3  1 | 19.6  53.1  21.7  2.8  2.1  0.7 | 17  48  12  1  1  0 | 21.5  60.8  15.2  1.3  1.3  0.0 | 0  3  0  0  0  0 | 0.0  100  0.0  0.0  0.0  0.0 |  |

*A.I: Ausencia de información por falta de respuesta. * Prueba de chi-cuadrado con diferencia significativa p<0.05.*

*Atención Primaria: Atención sanitaria primaria / Hospitalización: Ingreso hospitalario con pernocta / Urgencias: Urgencias en hospitales de 1er a 3er nivel.*

**Tabla 4:** Valoración de los servicios con respecto a sexo, edad y región de origen.

| **Variables** | **Sexo** | | | | **Edad (años)** | | | | | | **América Central /**  **Suramérica** | | **Asia** | | **Europa**  **Occidental** | | **Europa del**  **Este** | | **Africa** | | **TOTAL** | | **p** |
| --- | --- | --- | --- | --- | --- | --- | --- | --- | --- | --- | --- | --- | --- | --- | --- | --- | --- | --- | --- | --- | --- | --- | --- |
| Hombre | | Mujer | | <30 | | 30-45 | | >45 | |
| N | % | N | % | N | % | N | % | N | % | N | % | N | % | N | % | N | % | N | % | N | % |  |
| Ha recibido un trato respetuoso  Siempre  Casi siempre  Algunas veces  Nunca  A.I | 81  22  5  2  4 | 71.1  19.3  4.4  1.8  3.5 | 72  25  10  3  1 | 64.9  22.5  9.0  2.7  0.9 | 61  10  5  1  2 | 77.2  12.7  6.3  1.3  2.5 | 66  25  8  2  1 | 64.7  24.5  7.8  2.0  1.0 | 26  12  2  2  2 | 59.1  27.3  4.5  4.5  4.5 | 78  35  10  3  4 | 60.0*  26.9*  7.7*  2.3*  3.1* | 62  5  4  1  0 | 86.1*  6.9*  5.6*  1.4*  0.0* | 4  2  0  1  0 | 57.1*  28.6*  0.0*  14.3*  0.0* | 3  2  0  0  0 | 60.0*  40.0*  0.0*  0.0*  0.0* | 6  3  1  0  1 | 54.5*  27.3*  9.1*  0.0*  9.1* | 153  47  15  5  5 | 68.0  20.9  6.7  2.2  2.2 | p = 0.045 |
| Ha recibido información del acto asistencial  Siempre  Casi siempre  Algunas veces  Nunca  A.I | 64  26  16  4  4 | 56.1  22.8  14.0  3.5  3.5 | 71  18  12  9  1 | 64.0  16.2  10.  8.1  0.9 | 51  14  5  7  2 | 64.6*  17.7*  6.3*  8.9*  2.5* | 61  24  15  1  1 | 59.8*  23.5*  14.7*  1.0*  1.0* | 23  6  8  5  2 | 52.3*  13.6*  18.2*  11.4*  4.5* | 68  30  21  7  4 | 52.3*  23.1*  16.2*  54*  3.1* | 56  10  3  3  0 | 77.8*  13.9*  4.2*  4.2*  0.0* | 3  1  1  2  0 | 42.9*  14.3*  14.3*  28.6*  0.0* | 2  1  1  1  0 | 40.0*  20.0*  20.0*  20.0*  0.0* | 6  2  2  0  1 | 54.5*  18.2*  18.2*  0.0*  9.1* | 135  44  28  13  5 | 60.0  19.6  12.4  5.8  2.2 | p = 0.036 |
| Ha obtenido respuesta a sus preguntas  Siempre  Casi siempre  Algunas veces  Nunca  A.I | 65  21  17  7  4 | 57.0  18.4  14.9  6.1  3.5 | 67  23  15  5  1 | 60.4  20.7  13.5  4.5  0.9 | 46  14  10  7  2 | 58.2  17.7  12.7  8.9  2.5 | 64  19  14  4  1 | 62.7  18.6  13.7  3.9  1.0 | 22  11  8  1  2 | 50.0  25.0  18.2  2.3  4.5 | 67  34  23  2  4 | 51.5*  26.2*  17.7*  1.5*  3.1* | 57  7  3  5  0 | 79.2*  9.7*  4.2*  6.9*  0.0* | 2  1  2  2  0 | 28.6*  14.3*  28.6*  28.6*  0.0* | 1  2  1  1  0 | 20.0*  40.0*  20.0*  20.0*  0.0* | 5  0  3  2  1 | 45.5*  0.0*  27.3*  18.2*  9.1* | 132  44  32  12  5 | 58.7  19.6  14.2  5.3  2.2 | p = 0.000 |
| Ha sido fácil comunicarse  Siempre  Casi siempre  Algunas veces  Nunca  A.I | 65  21  18  6  4 | 57.0  18.4  15.8  5.3  3.5 | 64  22  13  11  1 | 57.7  19.8  11.7  9.9  0.9 | 41  14  12  10  2 | 5.9  17.7  15.2  12.7  2.5 | 63  18  15  5  1 | 61.8  17.6  14.7  4.9  1.0 | 25  11  4  2  2 | 56.8  25.0  9.1  4.5  4.5 | 84  26  14  2  4 | 64.6*  20.0*  10.8*  1.5*  3.1* | 37  13  10  12  0 | 51.4*  18.1*  13.9*  16.7*  0.0* | 2  1  2  2  0 | 28.6*  14.3*  28.6*  28.6*  0.0* | 3  1  1  0  0 | 60.0*  20.0*  20.0*  0.0*  0.0* | 3  2  4  1  1 | 27.3*  18.2*  36.4*  9.1*  9.1* | 129  43  31  17  5 | 57.3  19.1  13.8  7.6  2.2 | p = 0.003 |
| Han dado solución a su problema  Siempre  Casi siempre  Algunas veces  Nunca  A.I | 58  32  16  4  4 | 50.9  28.1  14.0  3.5  3.5 | 63  17  21  9  1 | 56.8  15.3  18.9  8.1  0.9 | 44  16  10  7  2 | 55.7  20.3  12.7  8.9  2.5 | 56  20  20  5  1 | 54.9  19.6  19.6  4.9  1.0 | 21  13  7  1  2 | 47.7  29.5  15.9  2.3  4.5 | 61  35  26  4  4 | 46.9*  26.9*  20.0*  3.1*  3.1* | 51  10  6  5  0 | 70.8*  13.9*  8.3*  6.9*  0.0* | 2  1  2  2  0 | 28.6*  14.3*  28.6*  28.6*  0.0* | 2  1  1  1  0 | 40.0*  20.0*  20.0*  20.0*  0.0* | 5  2  2  1  1 | 45.5*  18.2*  18.2*  9.1*  9.1* | 121  49  37  13  5 | 53.8  21.8  16.4  5.8  2.2 | p = 0.019 |

*A.I: Ausencia de información por falta de respuesta. * Prueba de chi-cuadrado con diferencia significativa p<0.05*

**Tabla 5:** Valoración global del Sistema de Salud respecto al país de origen.

| **Variables** | **Mejor que en su país de origen** | | **Igual que en su país de origen** | | **Peor que en su país de origen** | | **TOTAL** | | **p** |
| --- | --- | --- | --- | --- | --- | --- | --- | --- | --- |
| N | % | N | % | N | % | N | % |  |
| Sexo  Hombre  Mujer | 81  69 | 71.1  62.2 | 24  32 | 21.1  28.8 | 9  10 | 7.9  9.0 | 114  111 | 50.7  49.3 |  |
| Edad  <30 años  30-45 años  45 años | 54  71  25 | 68.4  69.6  56.8 | 18  24  14 | 22.8  23.5  31.8 | 7  7  5 | 8.9  6.9  11.4 | 79  102  44 | 35.1  45.3  19.6 |  |
| Permiso de residencia:  Con permiso de residencia legal  Sin permiso de residencia legal | 133  17 | 65.5  77.3 | 51  5 | 25.1  22.7 | 19  0 | 9.4  0.0 | 203  22 | 90.2  9.8 |  |
| País de origen  América Central / Suramérica  Asia  Europa Occidental  Europa del Este  África | 92  51  0  1  6 | 70.8*  70.8*  0.0*  20.0*  54.7* | 27  19  3  3  4 | 20.8*  26.4*  42.9*  60.0*  36.4* | 11  2  4  1  1 | 8.5*  2.8*  57.1*  20.0*  9.1* | 130  72  7  5  11 | 57.8  32.0  3.1  2.2  4.9 | p = 0.041 |
| Motivo de llegada a España  Turismo  Asilo Político  Estudio  Reagrupación familiar  Trabajo  Otros  A.I | 2  1  15  25  97  8  2 | 50.0  50.0  53.6  62.5  72.9  61.5  40.0 | 1  1  10  12  25  4  3 | 25.0  50.0  37.5  30.0  18.8  30.8  60.0 | 1  0  3  3  11  1  0 | 25.0  0.0  10.7  7.5  8.3  7.7  0.0 | 4  2  28  40  133  13  5 | 1.8  0.9  12.4  17.8  59.1  5.8  2.2 |  |
| Nivel de estudios:  Ninguno  Básico(leer/escribir)  Primarios (hasta los 14 años)  Secundarios (hasta los 18 años)  Superior (Universidad o equivalente) | 2  7  17  58  66 | 100  63.6  68.0  67.4  65.3 | 0  3  3  23  27 | 0.0  27.3  12.0  26.7  26.7 | 0  1  5  5  8 | 0.0  9.1  20.0  5.8  7.9 | 2  11  25  86  101 | 0.9  4.9  11.1  38.2  44.9 |  |
| Discriminación hacia los inmigrantes  De acuerdo  Parcialmente de acuerdo  No esta de acuerdo  No sabe/A.I | 55  35  38  22 | 69.6  63.6  64.4  68.7 | 16  15  16  9 | 20.3  27.3  27.1  28.1 | 8  5  5  1 | 3.6  2.2  2.2  3.1 | 79  55  59  32 | 35.1  24.4  26.2  14.2 |  |
| Ha recibido un trato respetuoso  Siempre  Casi siempre  Algunas veces  Nunca  A.I | 106  30  9  2  3 | 69.3  63.8  60.0  40.0  60.0 | 36  11  4  3  2 | 23.5  23.4  26.7  60.0  40.0 | 11  6  2  0  0 | 7.2  12.8  13.3  0.0  0.0 | 153  47  15  5  5 | 68.0  20.9  6.7  2.2  2.2 |  |
| Han dado solución a su problema  Siempre  Casi siempre  Algunas veces  Nunca  A.I | 86  36  19  6  3 | 71.1*  73.5*  51.4*  46.2*  60.0* | 31  8  11  4  2 | 25.6*  16.3*  29.7*  30.8*  40.0* | 4  5  7  3  0 | 3.3*  10.2*  18.9*  23.1*  0.0* | 121  49  37  13  5 | 53.8  218  16.4  5.8  2.2 | p < 0.001 |
| TOTAL | 150 | 66.7 | 56 | 24.9 | 19 | 8.4 | 225 | 100 |  |

*A.I: Ausencia de información por falta de respuesta. * Prueba de chi-cuadrado con diferencia significativa p<0.05*
